# Supplementary material for: CDAPubMed: a browser extension to retrieve EHR-based biomedical literature
Source: Springer Nature journal article supplement (doi:10.1186/1472-6947-12-29), 2012-04-05

#Retrieved citations

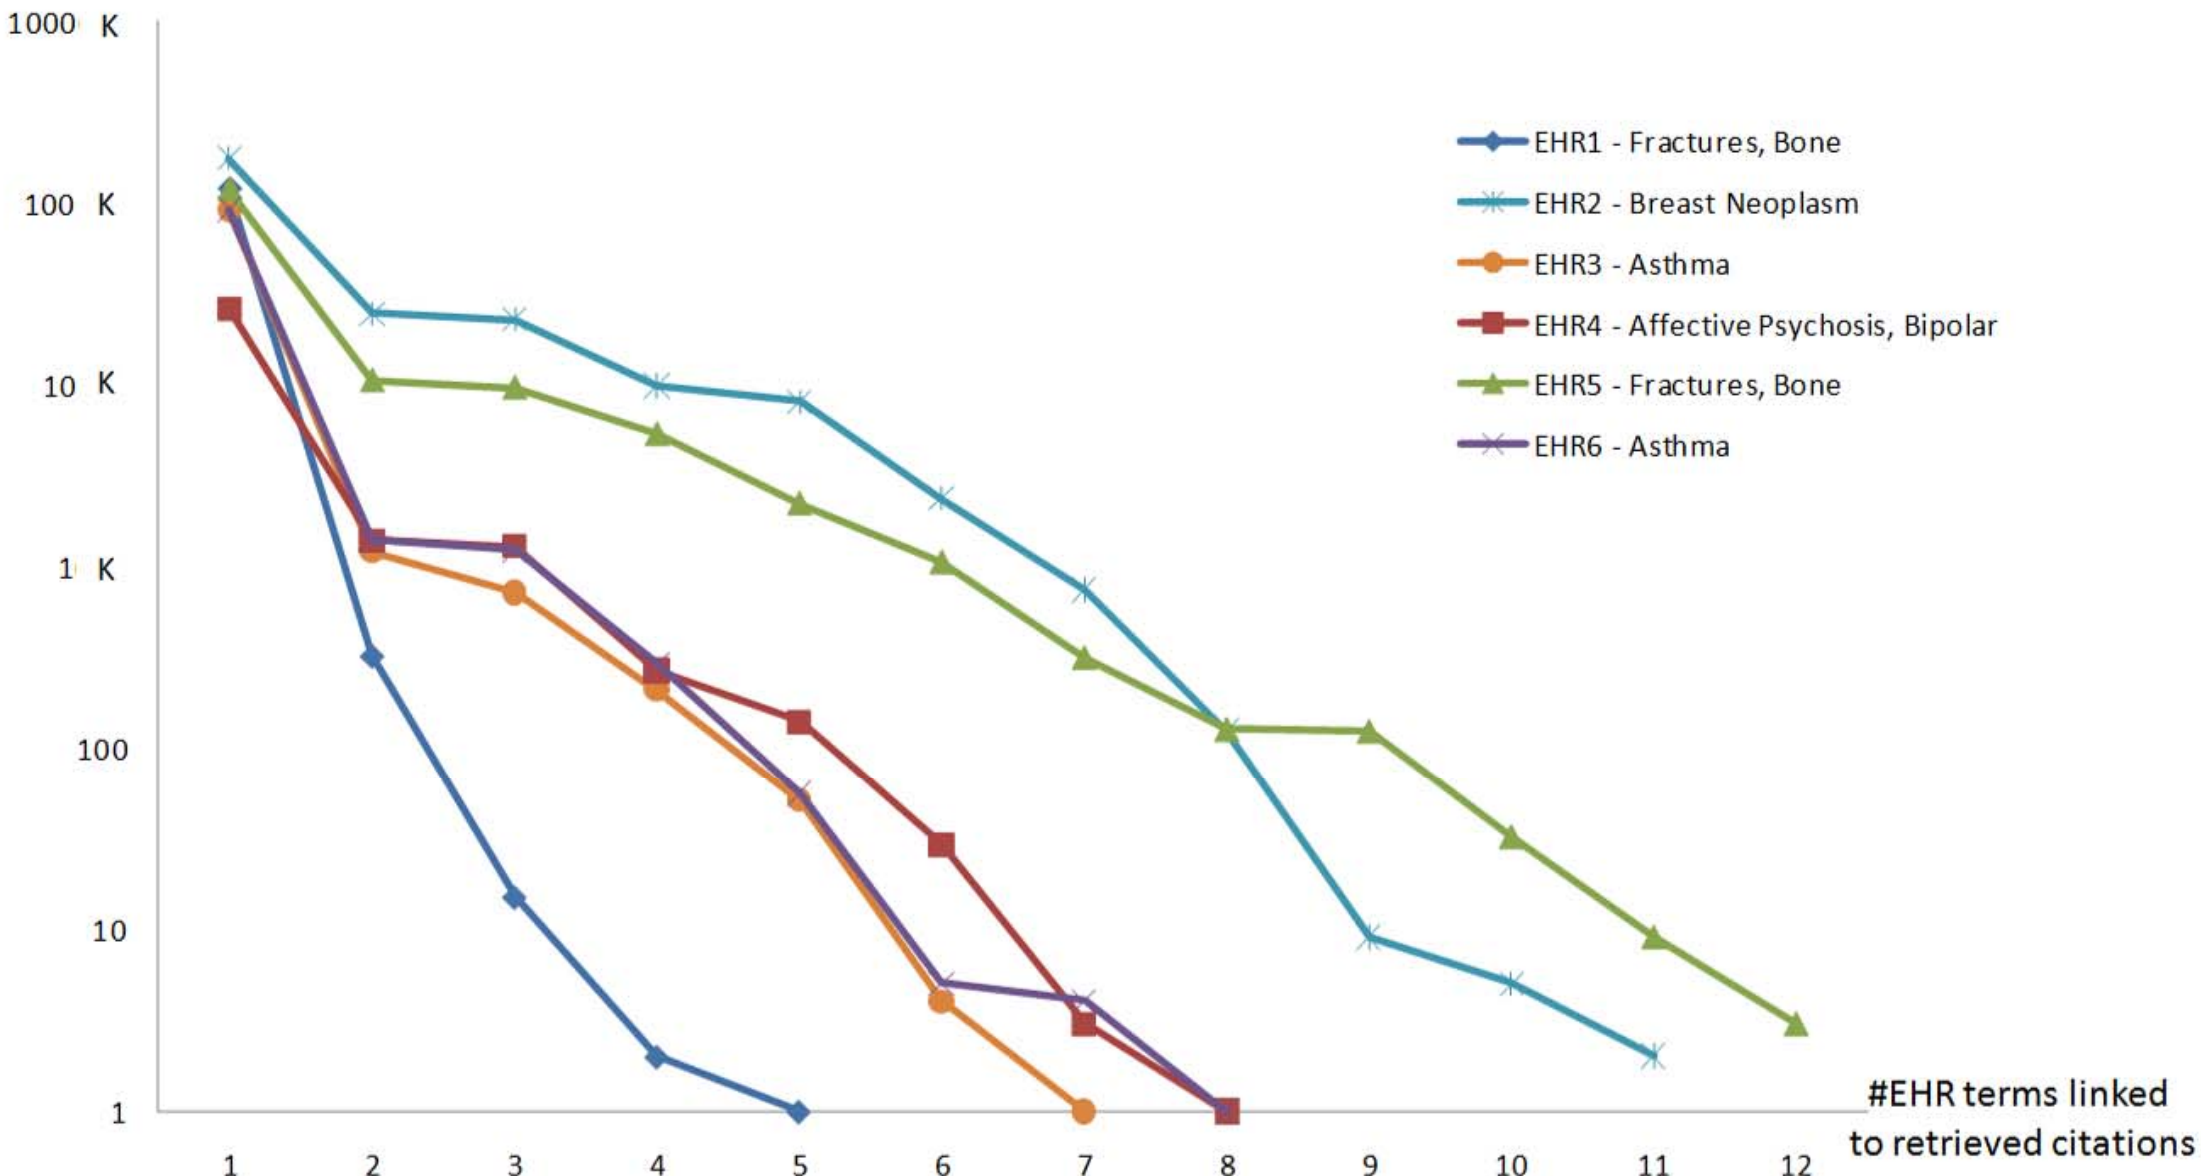

Supplement: 12911_2011_491_MOESM5_ESM.pdf [file 12911_2011_491_MOESM5_ESM.pdf]
